# Supplementary material
Source: PubMed Central journal article supplement (PMC2688691)
Supplement: NIHMS103066-supplement-Supplementary_Data.pdf [file NIHMS103066-supplement-Supplementary_Data.pdf]

**A**

|       |                 |              |            |          |                |                           |                     |
|-------|-----------------|--------------|------------|----------|----------------|---------------------------|---------------------|
|       | 1               | 10           | 20         | 30       | 40             | 50                        |                     |
| zPLd1 | .....MSD        | SVENLDTRE    | LGFSDA     | DEPEE    | VDFDFNPSGASR   | IGFSAIYRTVGFKD            |                     |
| hPLD1 | MSLKNEPRVNTS    | ALQKIAADMSNI | IENLDTRE   | LHFEGE   | VDYDVSFSDPKIQE | VYIPFSAIYNTQGFKE          |                     |
| mPLd1 | MSLKSETRVNTS    | TLQKIAADMSNI | IENLDTRE   | LHFEGE   | VEYDA          | SPGDPKAOEGCIPFSAIYNTQGFKE |                     |
| hPLD2 | .....MTATPESLFP | TGDELDSSO    | OMESD      | EVDTL    | KEGEPADRMH     | ...PFLAIYELQSIK           |                     |
|       | 60              | 70           | 80         | 90       | 100            | 110                       | 120                 |
| zPLd1 | TEAHVYLTSL      | PITAKILDVER  | FTRTQDRFKF | SKHRSV   | KAMPA          | VFKIELKHG                 | NFTWIVKRKEKHFLELHR  |
| hPLD1 | PNIQTYLSGC      | PIKAQVLEVER  | FSTST      | .....    | TRVPSIN        | .....                     | LYTIELTHGEF         |
| mPLd1 | PNIQTYLSGC      | PIKAQVLEVER  | FSTST      | .....    | SRVPSIN        | .....                     | LYTIELTHGEF         |
| hPLD2 | VHPLVFAPGV      | PVTAQVVGTER  | YTSG       | .....    | SKVGTCT        | .....                     | LYSVRLTHGDF         |
|       | 130             | 140          | 150        | 160      | 170            | 180                       | 190                 |
| zPLd1 | ELLKYKTLMRI     | PLPTRSHTE    | RKRKSIKRS  | SEVROMPA | LPRGGDGE       | LAREEQVS                  | SRRKOLEDYLNKLLK     |
| hPLD1 | ELLKYKAFIRI     | PIPTRRHT     | FRRQNVRE   | EPREMP   | SLPRSEN        | .....                     | MIREEQFLGRRKOLEDY   |
| mPLd1 | ELLKYKAFIRI     | PIPKRHT      | FRRQNVKE   | EPREMP   | SLPRSEN        | .....                     | AIQEEQFLGRRKOLEDY   |
| hPLD2 | DLRHKVAFIMS     | LPLARFAVAYS  | SPARDAGN   | REMP     | SLPRAGPEG      | .....                     | STRHAASKOKYLENYLNRL |
|       | 200             | 210          | 220        | 230      | 240            | 250                       | 260                 |
| zPLd1 | YRKYYATME       | FIDVSQLSF    | IQDLGPK    | LEGIVY   | KRSGGHR        | IPGMN                     | CCGHNEVCYRWSKRWL    |
| hPLD1 | YRNYHATTE       | FLDISQLSF    | IHDLGP     | KLEGIM   | KRSGGHR        | IPGLN                     | CCGQGRACYRWSKRWL    |
| mPLd1 | YRNYHATTE       | FLDVSQLSF    | IHDLGP     | KLEGIM   | KRSGGHR        | IPGMN                     | CCGHNEVCYRWSKRWL    |
| hPLD2 | YRNYHAMTE       | FLEVSQLSF    | IPDLGR     | KLEGIM   | KRSGGHR        | IPGLT                     | CCGRDQVCYRWSKRWL    |
|       | 270             | 280          | 290        | 300      | 310            | 320                       | 330                 |
| zPLd1 | KPDTGAI         | FVLLVDNE     | FSIKMDSK   | OTETKH   | GVRIENLS       | RKLVLF                    | KFTSYRHARWWGQAE     |
| hPLD1 | KPDSGAI         | FVLLVDKE     | FKIKVGGK   | ETETKY   | GIRIDNLS       | RTLILK                    | CNSYRHARWWGGA       |
| mPLd1 | KPDSGAI         | FVLLVDKE     | FRVKGVR    | KEETETKY | GLRIDNLS       | RTLILK                    | CNSYRHARWWGGA       |
| hPLD2 | CLETGAI         | FVOLFDPG     | FEVQVGR    | KSREARHG | GVRI           | DTSHRSL                   | LKCSYRQARWQA        |
|       | 340             | 350          | 360        | 370      | 380            | 390                       | 400                 |
| zPLd1 | RTHRFGS         | FARE         | EENIPSK    | WYVNGK   | TYMEDVA        | NALEEA                    | KEEIFITDWWLSPE      |
| hPLD1 | KDHRFGS         | YAAIQEN      | ALAKWYV    | NAKGF    | FEDVAN         | AMEE                      | ANEEEIFITDWWLSPE    |
| mPLd1 | KDHRFGS         | YAAP         | HENTLAK    | WYVNA    | KGF            | FEDIAN                    | AMEEAS              |
| hPLD2 | QLHRHDS         | YAP          | RPGLAR     | WFVNG    | AGYFA          | ADAILRA                   | QEEEIFITDWWLSPE     |
|       | 410             | 420          | 430        | 440      | 450            | 460                       | 470                 |
| zPLd1 | KRKAQQ          | GVRIFV       | MLYKE      | VELAL    | GINSE          | YSKKT                     | LMHLHPN             |
| hPLD1 | KRKAQQ          | GVRIFIM      | LYKE       | VELAL    | GINSE          | YTKRT                     | LMRLHPN             |
| mPLd1 | KRKAQQ          | GVRIFIM      | LYKE       | VELAL    | GINSE          | YSKRT                     | LMRLHPN             |
| hPLD2 | KRKAEE          | GVRISIL      | LK         | VELAL    | GINSG          | YSKRAL                    | MLHLHPN             |
|       | 480             | 490          | 500        | 510      | 520            | 530                       |                     |
| zPLd1 | FVGGI           | DLAYGR       | WDDREH     | RLTDV    | GSVTR          | .....                     | SVAA                |
| hPLD1 | FVGGI           | DLAYGR       | WDDNEH     | RLTDV    | GSVTR          | .....                     | SLGSL               |
| mPLd1 | FVGGI           | DLAYGR       | WDDNEH     | RLTDV    | GSVTR          | .....                     | SLGSL               |
| hPLD2 | FLGGL           | DLAYGR       | WDDLHY     | RLTDL    | GD             | .....                     | .....               |
|       | 540             | 550          | 560        | 570      |                |                           |                     |
| zPLd1 | LPLKKGIG        | RTRK         | TRFSLY     | HHIQRG   | LHHAD          | SISSIDS                   | TNK                 |
| hPLD1 | SPLKKGIG        | KPKR         | FKSFLY     | KQLHRR   | HLHAD          | SISSIDS                   | TSSYF               |
| mPLd1 | MPLKKGIG        | KPKR         | FKSFLY     | RQLHRR   | HLHAD          | SISSIDS                   | TSSYF               |
| hPLD2 | .....           | .....        | .....      | SSESA    | SQA            | QPP                       | TP                  |
|       | 580             | 590          | 600        | 610      | 620            | 630                       |                     |
| zPLd1 | .....           | SGSVH        | SLOT       | GVGEL    | MGNTR          | FWHG                      | KDYCNF              |
| hPLD1 | OGLTR           | PHAD         | TGS        | IRSLOT   | GVGEL          | LHGETR                    | FWHG                |
| mPLd1 | OGLTR           | HST          | TGS        | IRSVOT   | GVGEL          | LHGETR                    | FWHG                |
| hPLD2 | .....           | .....        | RPDSP      | ATPDL    | LSHN           | QF                        | FWL                 |
|       | 640             | 650          | 660        | 670      | 680            | 690                       | 700                 |
| zPLd1 | VHGKA           | ARDVAR       | HFIQR      | WNFTK    | IMKPKY         | RSLSY                     | PFLLPK              |
| hPLD1 | VHGKA           | ARDVAR       | HFIQR      | WNFTK    | IMKSKY         | RSLSY                     | PFLLPK              |
| mPLd1 | VHGKA           | ARDVAR       | HFIQR      | WNFTK    | IMKPKY         | RSLSY                     | PFLLPK              |
| hPLD2 | VHGLP           | ARDLAR       | HFIQR      | WNFTK    | TKAKY          | KTP                       | YPLLPK              |
|       | 710             | 720          | 730        | 740      | 750            | 760                       | 770                 |
| zPLd1 | IKYHE           | ESIHN        | AYIQV      | IAKSK    | HFIYI          | ENOFF                     | FISCAD              |
| hPLD1 | IKYHE           | ESIHA        | AYVHV      | IENS     | SRHYI          | YIEN                      | OFF                 |
| mPLd1 | IKYHE           | ESIHA        | AYIHV      | IENS     | SKHYI          | YIEN                      | OFF                 |
| hPLD2 | TL              | ENSIL        | NAYL       | HTIRES   | OHFLY          | IEN                       | OFF                 |
|       | 780             | 790          | 800        | 810      | 820            | 830                       | 840                 |
| zPLd1 | PGFEG           | DI           | TGGGN      | ALQAV    | MHFN           | NYRTM                     | NRGEYS              |
| hPLD1 | PGFEG           | DIS          | TGGGN      | ALQAI    | MHFN           | NYRTM                     | CRGENS              |
| mPLd1 | PGFEG           | DIS          | TGGGN      | ALQAI    | MHFN           | NYRTM                     | CRGESS              |
| hPLD2 | PGFEG           | DIS          | TGGGNS     | IQAIL    | HFTY           | RTL                       | CRGEYS              |
|       | 850             | 860          | 870        | 880      | 890            | 900                       | 910                 |
| zPLd1 | VHSKL           | LIADD        | N          | TVI      | IGSAN          | INDRS                     | MLGK                |
| hPLD1 | VHSKL           | LIADD        | N          | TVI      | IGSAN          | INDRS                     | MLGK                |
| mPLd1 | VHSKL           | LIADD        | N          | TVI      | IGSAN          | INDRS                     | MLGK                |
| hPLD2 | IHSKV           | LIADD        | N          | TVI      | IGSAN          | INDRS                     | LLGK                |
|       | 920             | 930          | 940        | 950      | 960            | 970                       | 980                 |
| zPLd1 | GAF             | TDP          | SID        | VDSP     | PISNS          | FYKDV                     | WMSV                |
| hPLD1 | GYL             | DDP          | SE         | DIQ      | DPV            | SKF                       | FKEV                |
| mPLd1 | GYL             | SDP          | SE         | LODP     | VPV            | SKF                       | FKEI                |
| hPLD2 | GAN             | TRP          | DL         | LRDP     | PIC            | DDFF                      | QLW                 |
|       | 990             | 1000         | 1010       | 1020     |                |                           |                     |
| zPLd1 | ELL             | KKIR         | GFL        | VQ       | PLDF           | LCE                       | ENL                 |
| hPLD1 | EEL             | KKIR         | GFL        | VQ       | PPY            | FL                        | SE                  |
| mPLd1 | EEL             | LRKIR        | GFL        | VQ       | PPY            | FL                        | SE                  |
| hPLD2 | SEL             | TOV          | OGHL       | VH       | FPL            | KFL                       | E                   |

Fig. S1A

**B**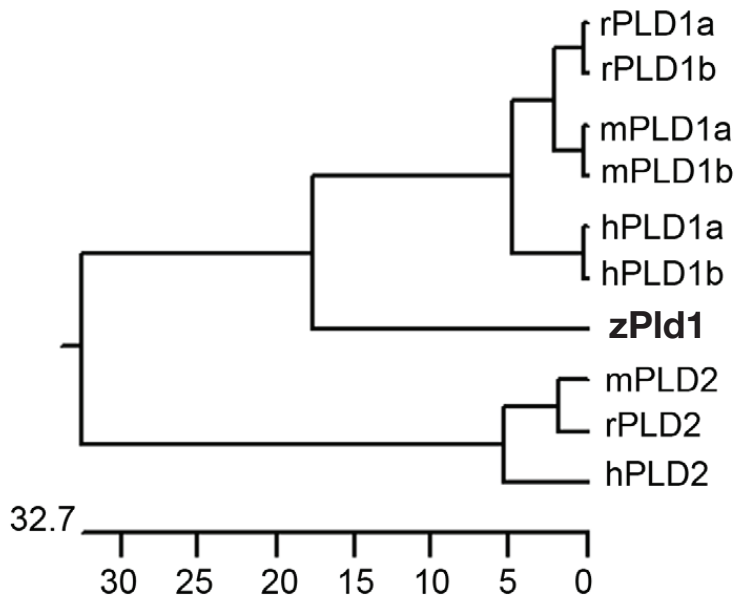**C**

|        | <b>zPld1</b> |
|--------|--------------|
| hPLD1a | 65.6         |
| hPLD1b | 67.5         |
| mPLD1a | 65.4         |
| mPLD1b | 67.8         |
| rPLD1a | 64.7         |
| rPLD1b | 66.2         |
| hPLD2  | 50.5         |
| mPLD2  | 49.6         |
| rPLD2  | 50.3         |
| dPLD   | 35.7         |
| yPLD   | 24.3         |

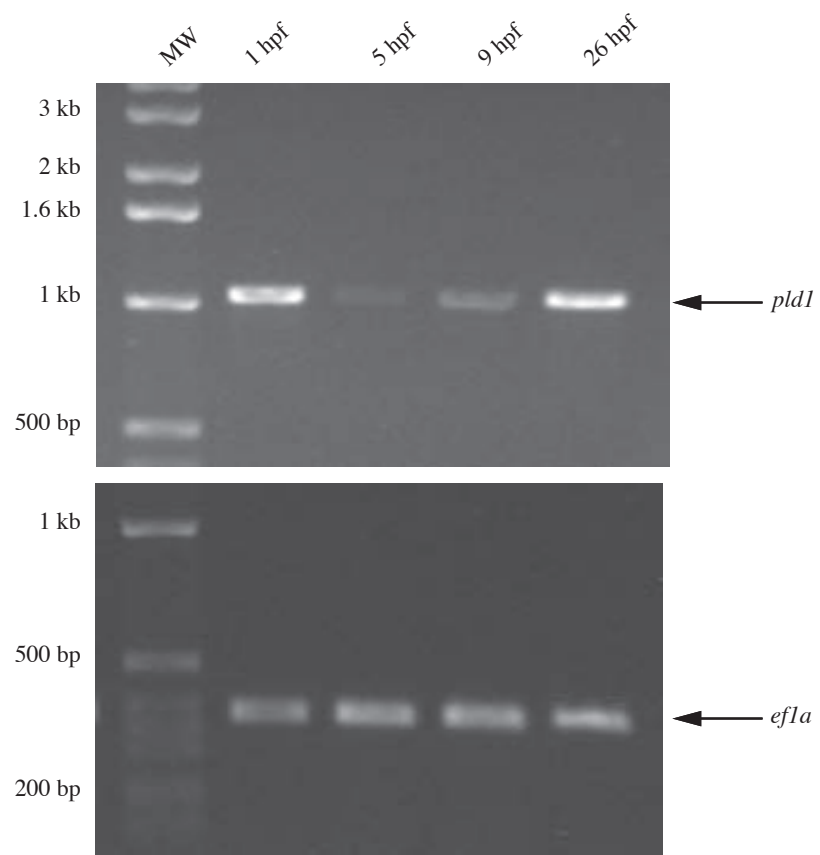

Fig. S2.

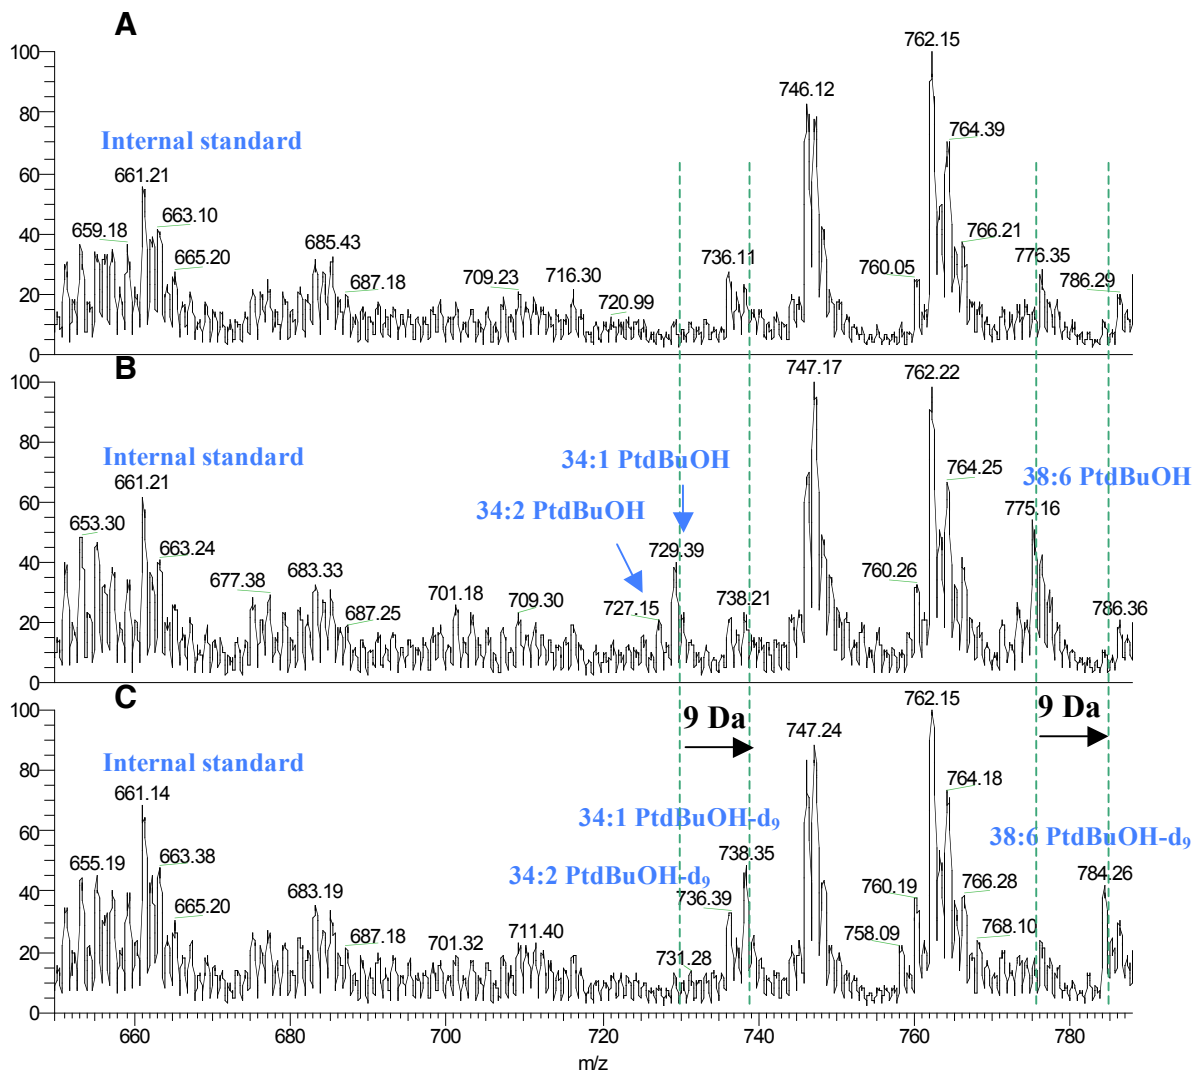

**Fig. S3. The endogenous Pld activity assay of the zebrafish embryo.**

(A) Mass spectrum of the global phospholipids extracted from the basal (untreated control) zebrafish embryos.

(B) Mass spectrum of the global phospholipids extracted from the embryos treated with PMA and 1-BuOH.

(C) Mass spectrum of the global phospholipids extracted from the embryos treated with PMA and 1-BuOH-d<sub>10</sub>.

**Fig. S4. The MS/MS spectra of the PtdBuOH in the endogenous Pld1 activity assay of the zebrafish embryos.**

**A**

BuOH-1 neg-729 #1-90 RT: 0.01-1.00 AV: 90 NL: 1.97E5  
 T: -p Fulms2 729.00@30.00 [ 100.00-800.00]

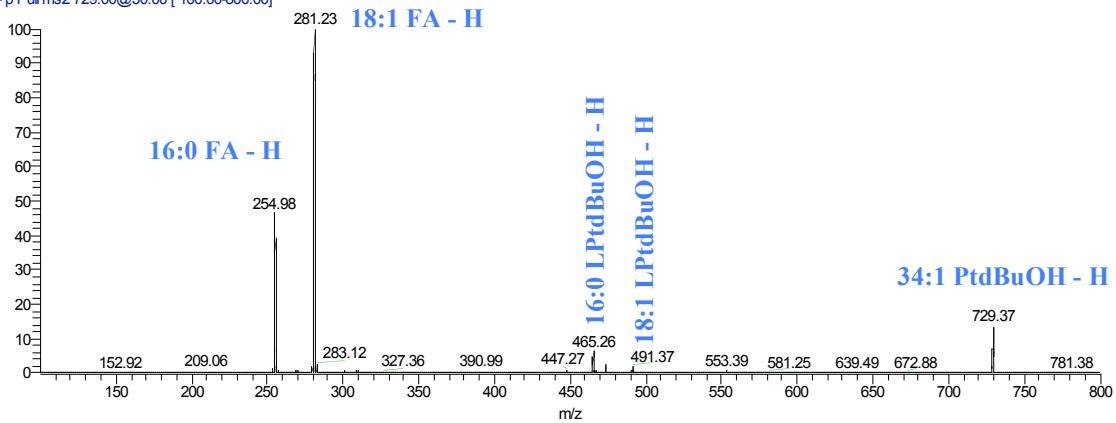**B**

control 2 neg-738 #1-51 RT: 0.01-0.98 AV: 51 NL: 7.62E4  
 T: -p Fulms2 738.00@30.00 [ 50.00-750.00]

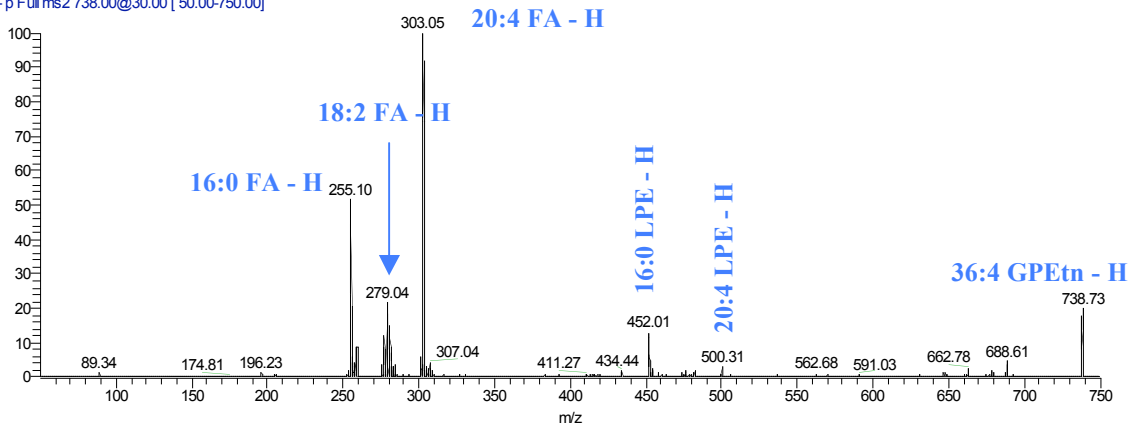**C**

BuOH-d10-1 neg-738 #1-90 RT: 0.01-0.99 AV: 90 NL: 1.45E5  
 T: -p Fulms2 737.90@32.00 [ 100.00-800.00]

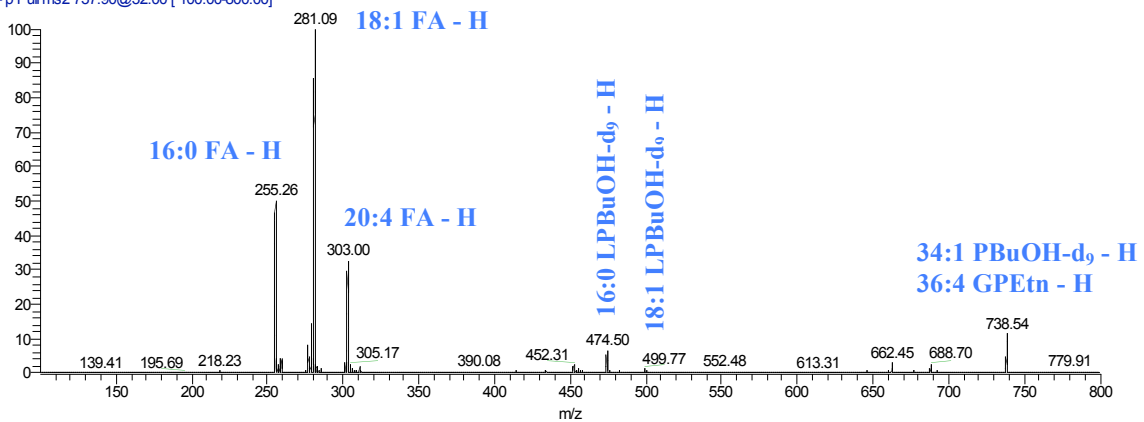

**Fig. S4. The MS/MS spectra of the PtdBuOH in the endogenous Pld1 activity assay of the zebrafish embryos.**

(A) MS/MS spectrum of  $m/z$  729 in the PMA + 1-BuOH treated embryos.

(B) MS/MS spectrum of  $m/z$  738 in control sample.

(C) MS/MS spectrum of  $m/z$  738 in the PMA + 1-BuOH-d<sub>10</sub> treated embryos.

**D**

control neg-736 #1-89 RT: 0.01-0.99 AV: 89 NL: 3.57E4  
 T: -p Fullms2 736.50@29.00 [ 150.00-800.00]

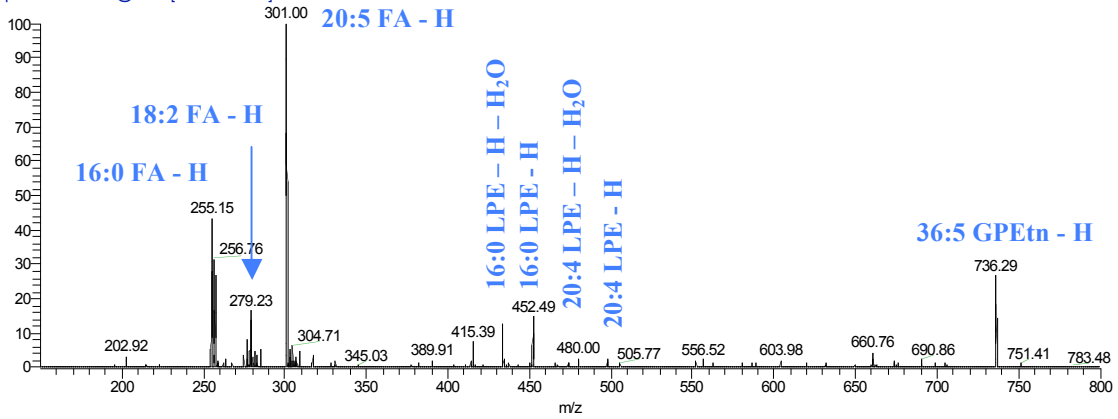**E**

WT-PMA + 2H-BuOH- 2 neg 736 #1-88 RT: 0.01-0.99 AV: 88 NL: 5.47E4  
 T: -p Fullms2 736.30@31.00 [ 100.00-800.00]

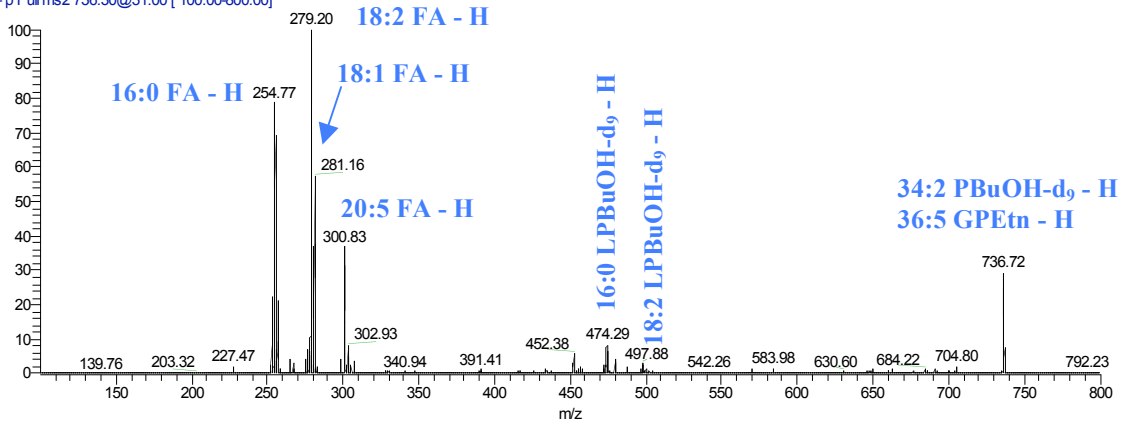

**Fig. S4. The MS/MS spectra of the PtdBuOH in the endogenous Pld1 activity assay of the zebrafish embryos.**

(D) MS/MS spectrum of  $m/z$  736 in control sample.

(E) MS/MS spectrum of  $m/z$  736 in the PMA + 1-BuOH- $d_{10}$  treated embryos.

**F**

BuOH-2-neg-775 #1-90 RT: 0.01-1.00 AV: 90 NL: 8.44E4  
 T: -p Fullms2 774.90@32.00 [ 100.00-800.00]

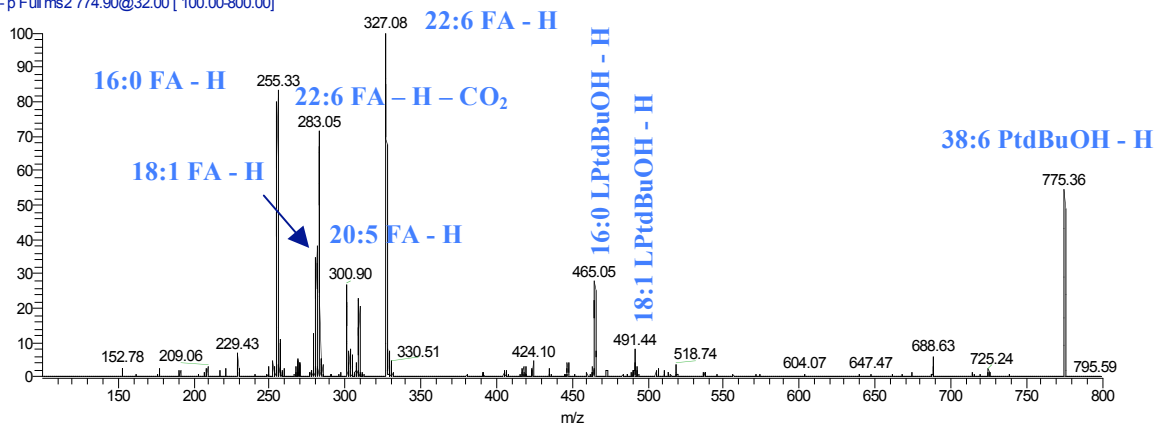**G**

BuOH-d10-2 neg-784-2 #1-90 RT: 0.00-0.99 AV: 90 NL: 8.10E4  
 T: -p Fullms2 783.90@32.00 [ 100.00-800.00]

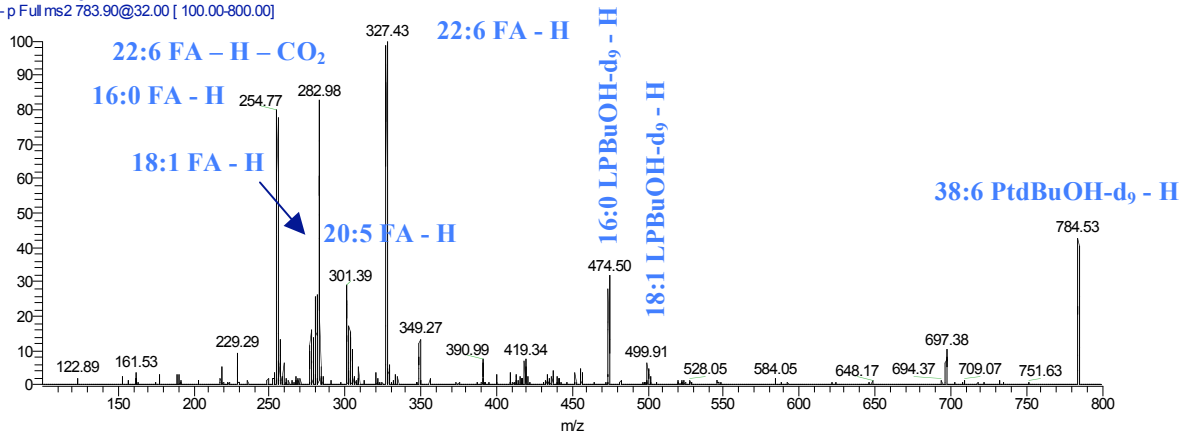

**Fig. S4. The MS/MS spectra of the PtdBuOH in the endogenous Pld1 activity assay of the zebrafish embryos.**

(F) MS/MS spectrum of  $m/z$  775 in the PMA + 1-BuOH treated embryos.

(G) MS/MS spectrum of  $m/z$  784 in the PMA + 1-BuOH-d<sub>10</sub> treated embryos.



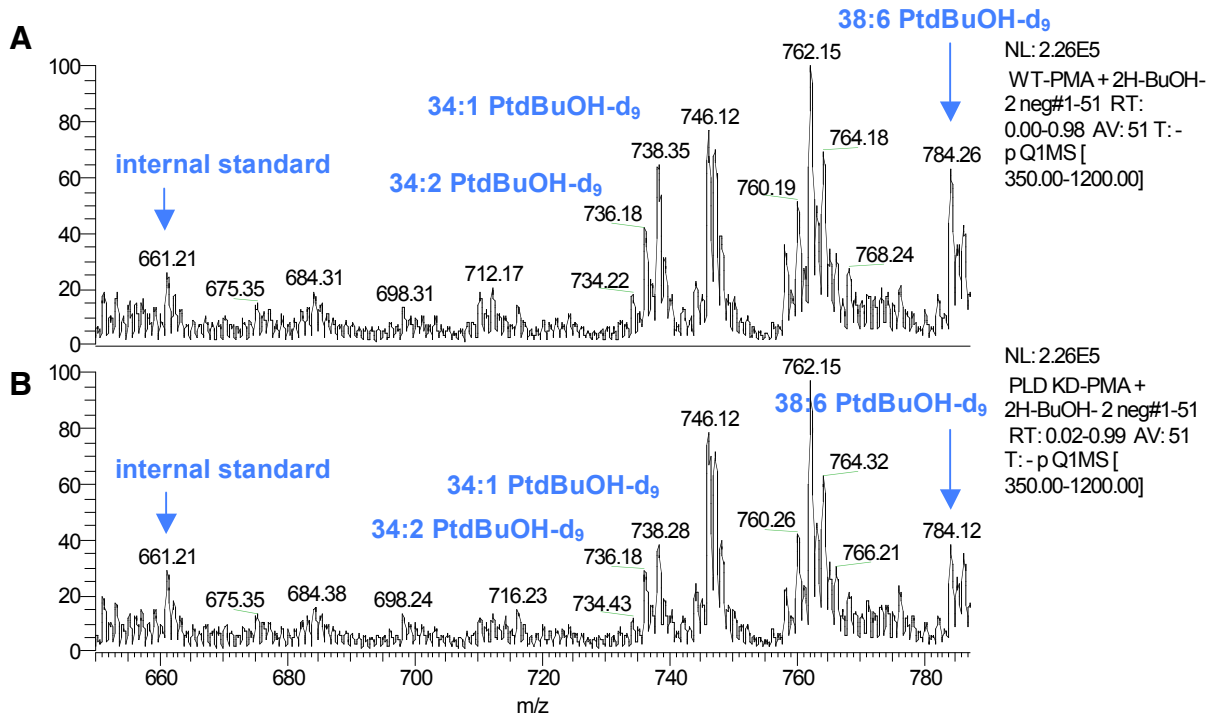

**Fig. S5. The endogenous Pld activity assay in *pld1* morphant zebrafish embryos.**

(A) The mass spectrum of the global lipids extracted from the PMA + 1-BuOH-d<sub>10</sub> treated wild type zebrafish embryos.

(B) The mass spectrum of the global lipids extracted from the PMA + 1-BuOH-d<sub>10</sub> treated MO1-*pld1* injected zebrafish embryos.

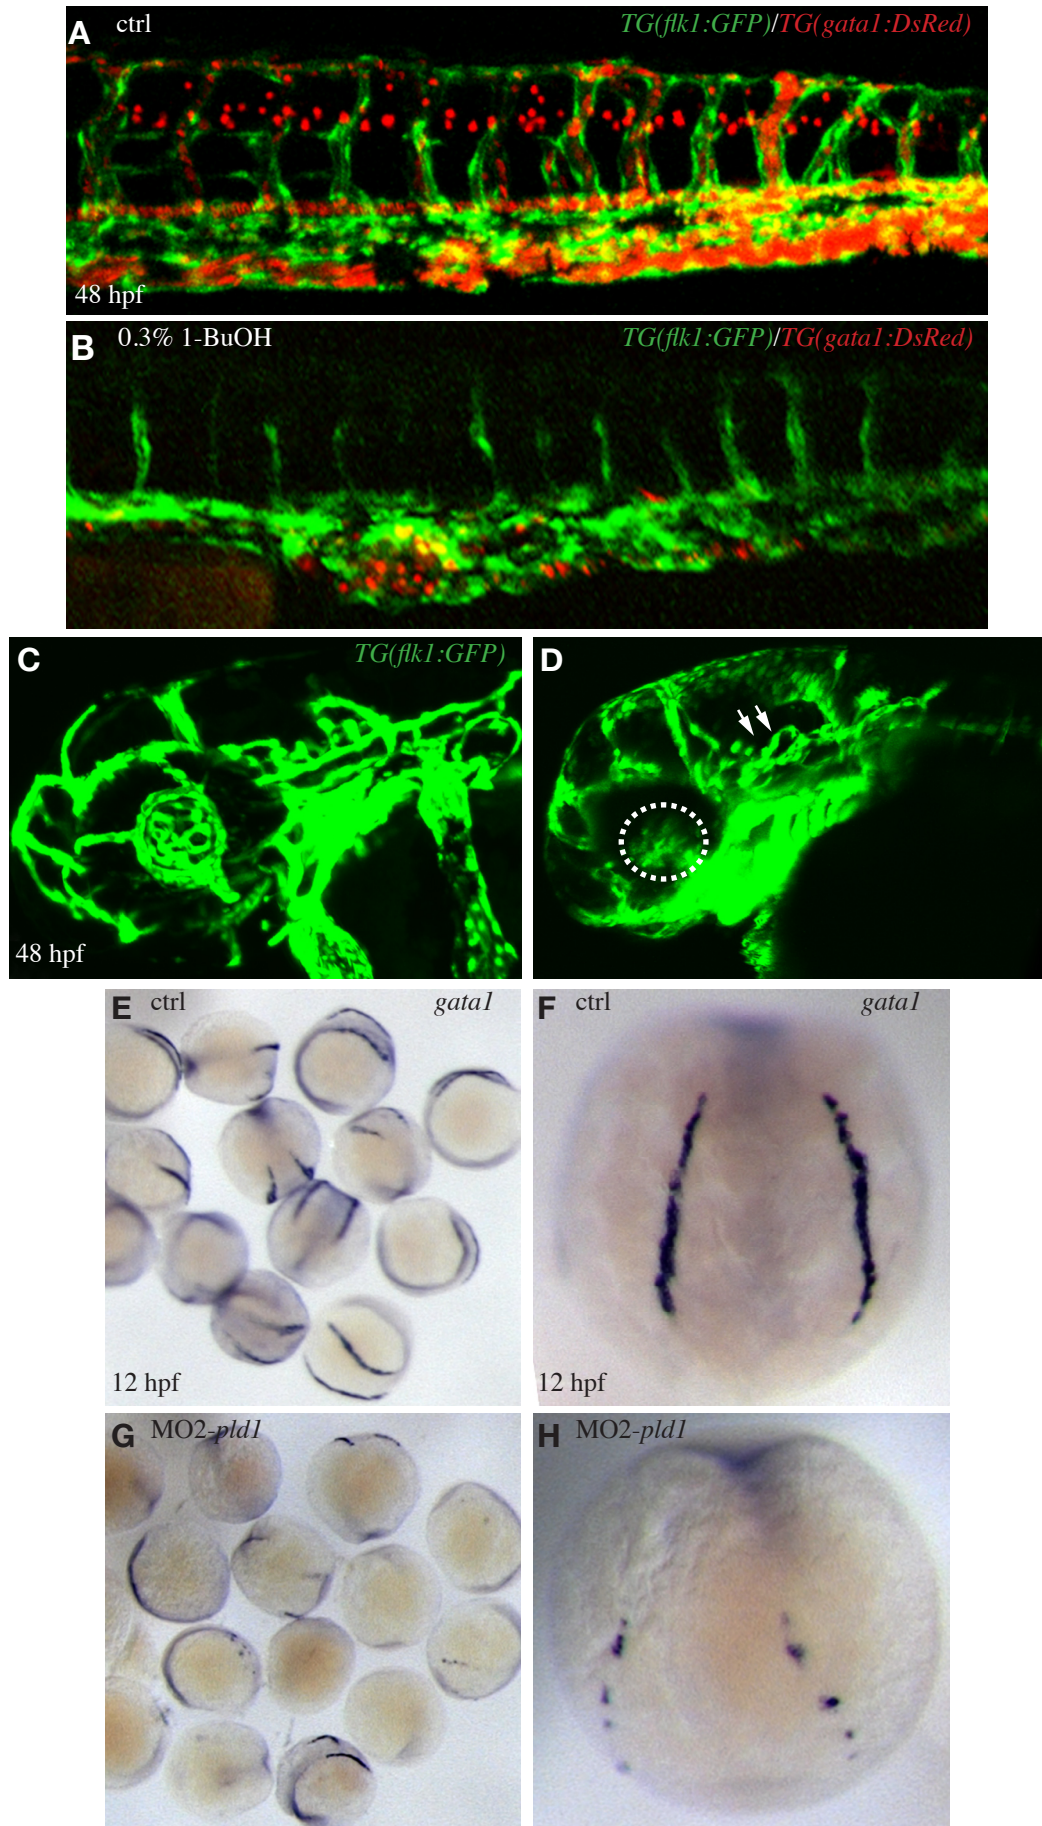

supplementary Fig. 6
